# Supplementary material for: Phylogeographic data revealed shallow genetic structure in the kelp Saccharina japonica (Laminariales, Phaeophyta)
Source: PubMed Central journal article supplement (PMC4630829; doi:10.1186/s12862-015-0517-8), 2015-11-02
Supplement: 12862_2015_517_MOESM1_ESM.pdf [file 12862_2015_517_MOESM1_ESM.pdf]

**Table S1** Collection details of the 26 populations of *Saccharina japonica* studied.

| <b>Population number</b> | <b>Sample site</b>      | <b>Sample size</b> | <b>Coordinates</b> | <b>Data of collection</b> |
|--------------------------|-------------------------|--------------------|--------------------|---------------------------|
| 1                        | Hokkaido, Japan         | 27                 | N45°27' E141°38'   | 2012.12                   |
| 2                        | Hokkaido, Japan         | 6                  | N45°24' E141°40'   | 2012.12                   |
| 3                        | Hokkaido, Japan         | 22                 | N43°20' E140°23'   | 2012.07                   |
| 4                        | Hokkaido, Japan         | 10                 | N43°11' E140°47'   | 2012.07                   |
| 5                        | Hokkaido, Japan         | 24                 | N43°12' E140°51'   | 2012.07                   |
| 6                        | Hokkaido, Japan         | 21                 | N43°12' E141°00'   | 2012.07                   |
| 7                        | Hokkaido, Japan         | 28                 | N41°46' E140°41'   | 2011.10                   |
| 8                        | Hokkaido, Japan         | 26                 | N42°06' E140°35'   | 2011.10                   |
| 9                        | Hokkaido, Japan         | 7                  | N42°31' E140°23'   | 2012.07                   |
| 10                       | Hokkaido, Japan         | 28                 | N43°17' E145°31'   | 2012.07                   |
| 11                       | Hokkaido, Japan         | 32                 | N43°58' E144°52'   | 2012.06                   |
| 12                       | Kunashir Island, Russia | 28                 | N44°03' E145°43'   | 2011.09                   |
| 13                       | Sakhalin, Russia        | 24                 | N46°06' E143°18'   | 2011.09                   |
| 14                       | Sakhalin, Russia        | 29                 | N46°36' E142°54'   | 2011.09                   |
| 15                       | Sakhalin, Russia        | 28                 | N46°25' E141°51'   | 2013.09                   |
| 16                       | Sakhalin, Russia        | 21                 | N46°32' E141°48'   | 2011.09                   |
| 17                       | Sakhalin, Russia        | 30                 | N46°32' E141°48'   | 2011.09                   |
| 18                       | Sakhalin, Russia        | 16                 | N47°08' E142°03'   | 2011.09                   |
| 19                       | Sakhalin, Russia        | 26                 | N48°50' E141°55'   | 2011.09                   |
| 20                       | Sakhalin, Russia        | 29                 | N48°50' E141°55'   | 2011.09                   |
| 21                       | Primorsky, Russia       | 30                 | N43°57' E135°27'   | 2012.10                   |
| 22                       | Primorsky, Russia       | 6                  | N43°06' E131°52'   | 2011.09                   |
| 23                       | South Korea             | 27                 | N37°47' E128°55'   | 2013.06                   |
| 24                       | Liaoning, China         | 27                 | N39°05' E 122°47'  | 2014.07                   |
| 25                       | Shandong, China         | 30                 | N37°29' E121°34'   | 2011.05                   |
| 26                       | Shandong, China         | 30                 | N37°09' E122°35'   | 2011.05                   |
