# Supplementary material for: Phylogeographic data revealed shallow genetic structure in the kelp Saccharina japonica (Laminariales, Phaeophyta)
Source: PubMed Central journal article supplement (PMC4630829; doi:10.1186/s12862-015-0517-8), 2015-11-02

Figure S1 Tessellation illustration of Bayesian analysis of population structure. Each cell of the tessellation corresponds to the physical **neighborhood** of an observed data point. Various **colors** indicate genetic groupings as retrieved by phylogenetic analyses.

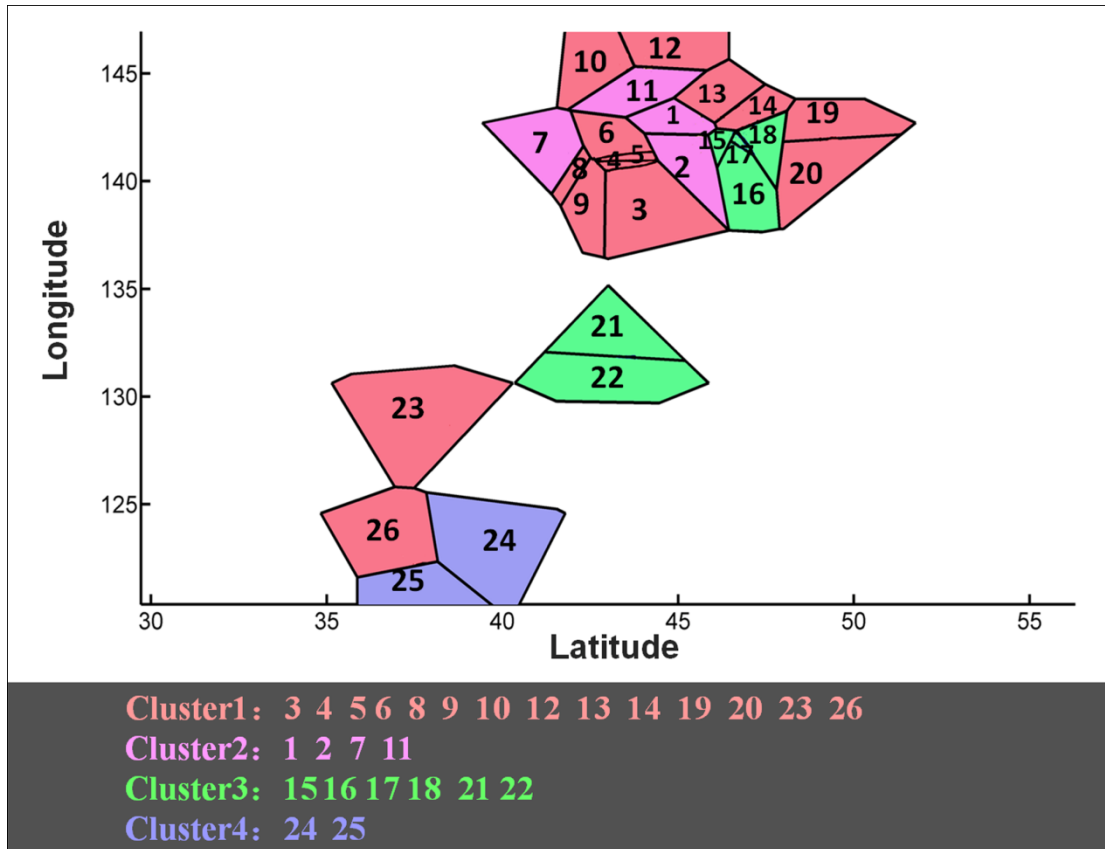

Supplement: 12862_2015_517_MOESM2_ESM.pdf [file 12862_2015_517_MOESM2_ESM.pdf]
