# Supplementary material for: Phylogeographic data revealed shallow genetic structure in the kelp Saccharina japonica (Laminariales, Phaeophyta)
Source: PubMed Central journal article supplement (PMC4630829; doi:10.1186/s12862-015-0517-8), 2015-11-02
Supplement: 12862_2015_517_MOESM3_ESM.pdf [file 12862_2015_517_MOESM3_ESM.pdf]

Table S2 Genetic differentiation ( $F_{ST}$ ) between the pairs of four genetic clusters

|                  | <b>Cluster 1</b> | <b>Cluster 2</b> | <b>Cluster 3</b> | <b>Cluster 4</b> |
|------------------|------------------|------------------|------------------|------------------|
| <b>Cluster 1</b> |                  |                  |                  |                  |
| <b>Cluster 2</b> | 0.22309**        |                  |                  |                  |
| <b>Cluster 3</b> | 0.62105**        | 0.46619*         |                  |                  |
| <b>Cluster 4</b> | 0.77709**        | 0.56143**        | 0.87016**        |                  |

\*\* ,  $P < 0.001$ ; \* ,  $P < 0.05$
