# Supplementary material for: Phylogeographic data revealed shallow genetic structure in the kelp Saccharina japonica (Laminariales, Phaeophyta)
Source: PubMed Central journal article supplement (PMC4630829; doi:10.1186/s12862-015-0517-8), 2015-11-02
Supplement: 12862_2015_517_MOESM4_ESM.pdf [file 12862_2015_517_MOESM4_ESM.pdf]

Table S3 Pairwise  $F_{ST}$  estimates among *Saccharina japonica* populations. \*  $P < 0.05$ ; \*\*  $P < 0.001$ ; ns, not significant

|    | 1                    | 2                    | 3                     | 4                    | 5                    | 6                     | 7                    | 8                    | 9                     | 10                    | 11                   | 12                     | 13                    | 14                    | 15                    | 16                    | 17                    | 18                    | 19                    | 20                    | 21                   | 22                    | 23                   | 24                   | 25                   |  |
|----|----------------------|----------------------|-----------------------|----------------------|----------------------|-----------------------|----------------------|----------------------|-----------------------|-----------------------|----------------------|------------------------|-----------------------|-----------------------|-----------------------|-----------------------|-----------------------|-----------------------|-----------------------|-----------------------|----------------------|-----------------------|----------------------|----------------------|----------------------|--|
| 1  | 0                    |                      |                       |                      |                      |                       |                      |                      |                       |                       |                      |                        |                       |                       |                       |                       |                       |                       |                       |                       |                      |                       |                      |                      |                      |  |
| 2  | 0.1161 <sup>ns</sup> | 0                    |                       |                      |                      |                       |                      |                      |                       |                       |                      |                        |                       |                       |                       |                       |                       |                       |                       |                       |                      |                       |                      |                      |                      |  |
| 3  | 0.6753 <sup>**</sup> | 0.9147 <sup>**</sup> | 0                     |                      |                      |                       |                      |                      |                       |                       |                      |                        |                       |                       |                       |                       |                       |                       |                       |                       |                      |                       |                      |                      |                      |  |
| 4  | 0.5431 <sup>**</sup> | 0.6304 <sup>**</sup> | 0.2321 <sup>ns</sup>  | 0                    |                      |                       |                      |                      |                       |                       |                      |                        |                       |                       |                       |                       |                       |                       |                       |                       |                      |                       |                      |                      |                      |  |
| 5  | 0.5431 <sup>**</sup> | 0.5984 <sup>**</sup> | 0.2503 <sup>*</sup>   | 0.1898 <sup>ns</sup> | 0                    |                       |                      |                      |                       |                       |                      |                        |                       |                       |                       |                       |                       |                       |                       |                       |                      |                       |                      |                      |                      |  |
| 6  | 0.6456 <sup>**</sup> | 0.8568 <sup>**</sup> | 0.0023 <sup>ns</sup>  | 0.1759 <sup>ns</sup> | 0.2286 <sup>ns</sup> | 0                     |                      |                      |                       |                       |                      |                        |                       |                       |                       |                       |                       |                       |                       |                       |                      |                       |                      |                      |                      |  |
| 7  | 0.4305 <sup>**</sup> | 0.3840 <sup>ns</sup> | 0.2891 <sup>**</sup>  | 0.2164 <sup>*</sup>  | 0.2713 <sup>**</sup> | 0.2791 <sup>*</sup>   | 0                    |                      |                       |                       |                      |                        |                       |                       |                       |                       |                       |                       |                       |                       |                      |                       |                      |                      |                      |  |
| 8  | 0.5940 <sup>**</sup> | 0.7238 <sup>**</sup> | 0.1189 <sup>ns</sup>  | 0.1499 <sup>*</sup>  | 0.2281 <sup>**</sup> | 0.0998 <sup>*</sup>   | 0.2935 <sup>**</sup> | 0                    |                       |                       |                      |                        |                       |                       |                       |                       |                       |                       |                       |                       |                      |                       |                      |                      |                      |  |
| 9  | 0.5847 <sup>**</sup> | 0.8292 <sup>**</sup> | 0.0000 <sup>ns</sup>  | 0.0805 <sup>ns</sup> | 0.1482 <sup>ns</sup> | -0.0573 <sup>ns</sup> | 0.1912 <sup>*</sup>  | 0.0397 <sup>ns</sup> | 0                     |                       |                      |                        |                       |                       |                       |                       |                       |                       |                       |                       |                      |                       |                      |                      |                      |  |
| 10 | 0.7019 <sup>**</sup> | 0.9297 <sup>**</sup> | 0.0000 <sup>ns</sup>  | 0.2765 <sup>ns</sup> | 0.2807 <sup>*</sup>  | 0.0141 <sup>ns</sup>  | 0.3185 <sup>**</sup> | 0.1401 <sup>*</sup>  | 0.0000 <sup>ns</sup>  | 0                     |                      |                        |                       |                       |                       |                       |                       |                       |                       |                       |                      |                       |                      |                      |                      |  |
| 11 | 0.4879 <sup>**</sup> | 0.6812 <sup>**</sup> | 0.1298 <sup>ns</sup>  | 0.1801 <sup>*</sup>  | 0.2528 <sup>**</sup> | 0.1106 <sup>*</sup>   | 0.3199 <sup>**</sup> | 0.1481 <sup>**</sup> | 0.0556 <sup>ns</sup>  | 0.1494 <sup>*</sup>   | 0                    |                        |                       |                       |                       |                       |                       |                       |                       |                       |                      |                       |                      |                      |                      |  |
| 12 | 0.6780 <sup>**</sup> | 0.8843 <sup>**</sup> | -0.0089 <sup>ns</sup> | 0.2209 <sup>ns</sup> | 0.2621 <sup>*</sup>  | 0.0018 <sup>ns</sup>  | 0.3133 <sup>**</sup> | 0.1198 <sup>*</sup>  | -0.0614 <sup>ns</sup> | 0.0000 <sup>ns</sup>  | 0.1285 <sup>*</sup>  | 0                      |                       |                       |                       |                       |                       |                       |                       |                       |                      |                       |                      |                      |                      |  |
| 13 | 0.6375 <sup>**</sup> | 0.8245 <sup>**</sup> | -0.0037 <sup>ns</sup> | 0.1598 <sup>ns</sup> | 0.2283 <sup>**</sup> | -0.0016 <sup>ns</sup> | 0.2813 <sup>**</sup> | 0.0954 <sup>*</sup>  | -0.0595 <sup>ns</sup> | 0.0066 <sup>ns</sup>  | 0.1048 <sup>*</sup>  | 0.0025 <sup>ns</sup>   | 0                     |                       |                       |                       |                       |                       |                       |                       |                      |                       |                      |                      |                      |  |
| 14 | 0.6413 <sup>**</sup> | 0.8124 <sup>**</sup> | 0.0114 <sup>ns</sup>  | 0.1643 <sup>*</sup>  | 0.2391 <sup>*</sup>  | 0.0110 <sup>ns</sup>  | 0.3089 <sup>**</sup> | 0.1022 <sup>*</sup>  | -0.0449 <sup>ns</sup> | 0.0222 <sup>ns</sup>  | 0.1108 <sup>*</sup>  | 0.0170 <sup>ns</sup>   | 0.0124 <sup>ns</sup>  | 0                     |                       |                       |                       |                       |                       |                       |                      |                       |                      |                      |                      |  |
| 15 | 0.6556 <sup>**</sup> | 0.8428 <sup>**</sup> | -0.0089 <sup>ns</sup> | 0.1816 <sup>ns</sup> | 0.2457 <sup>*</sup>  | -0.0024 <sup>ns</sup> | 0.3082 <sup>**</sup> | 0.1046 <sup>*</sup>  | -0.0614 <sup>ns</sup> | 0.0000 <sup>ns</sup>  | 0.1129 <sup>*</sup>  | 0.0000 <sup>ns</sup>   | 0.0005 <sup>ns</sup>  | 0.0138 <sup>ns</sup>  | 0                     |                       |                       |                       |                       |                       |                      |                       |                      |                      |                      |  |
| 16 | 0.6227 <sup>**</sup> | 0.8077 <sup>**</sup> | 0.0023 <sup>ns</sup>  | 0.1426 <sup>ns</sup> | 0.2145 <sup>*</sup>  | 0.0000 <sup>ns</sup>  | 0.2746 <sup>**</sup> | 0.0885 <sup>*</sup>  | -0.0573 <sup>ns</sup> | 0.0141 <sup>ns</sup>  | 0.0990 <sup>*</sup>  | 0.0059 <sup>ns</sup>   | 0.0004 <sup>ns</sup>  | 0.0120 <sup>ns</sup>  | 0.0018 <sup>ns</sup>  | 0                     |                       |                       |                       |                       |                      |                       |                      |                      |                      |  |
| 17 | 0.6901 <sup>**</sup> | 0.8932 <sup>**</sup> | -0.0116 <sup>ns</sup> | 0.2384 <sup>ns</sup> | 0.2753 <sup>*</sup>  | 0.0031 <sup>ns</sup>  | 0.3266 <sup>ns</sup> | 0.1279 <sup>*</sup>  | -0.0624 <sup>ns</sup> | -0.0034 <sup>ns</sup> | 0.1358 <sup>*</sup>  | 0.0002 <sup>ns</sup>   | 0.0045 <sup>ns</sup>  | 0.0196 <sup>ns</sup>  | -0.0218 <sup>ns</sup> | 0.0085 <sup>ns</sup>  | 0                     |                       |                       |                       |                      |                       |                      |                      |                      |  |
| 18 | 0.6180 <sup>**</sup> | 0.8275 <sup>**</sup> | 0.0206 <sup>ns</sup>  | 0.1395 <sup>ns</sup> | 0.2017 <sup>ns</sup> | 0.0021 <sup>ns</sup>  | 0.2510 <sup>**</sup> | 0.0844 <sup>ns</sup> | -0.0503 <sup>ns</sup> | 0.0370 <sup>ns</sup>  | 0.0972 <sup>ns</sup> | 0.0081 <sup>ns v</sup> | -0.0030 <sup>ns</sup> | 0.0077 <sup>ns</sup>  | -0.0018 <sup>ns</sup> | -0.0031 <sup>ns</sup> | 0.0109 <sup>ns</sup>  | 0                     |                       |                       |                      |                       |                      |                      |                      |  |
| 19 | 0.6694 <sup>**</sup> | 0.8776 <sup>**</sup> | -0.0066 <sup>ns</sup> | 0.2086 <sup>ns</sup> | 0.2529 <sup>*</sup>  | 0.0010 <sup>ns</sup>  | 0.3040 <sup>**</sup> | 0.1143 <sup>ns</sup> | -0.0606 <sup>ns</sup> | 0.0029 <sup>ns</sup>  | 0.1235 <sup>*</sup>  | 0.0001 <sup>ns *</sup> | 0.0012 <sup>ns</sup>  | 0.0152 <sup>ns</sup>  | -0.0008 <sup>ns</sup> | 0.0042 <sup>ns</sup>  | 0.0006 <sup>ns</sup>  | 0.0062 <sup>ns</sup>  | 0                     |                       |                      |                       |                      |                      |                      |  |
| 20 | 0.6002 <sup>**</sup> | 0.7430 <sup>**</sup> | -0.0099 <sup>ns</sup> | 0.1157 <sup>ns</sup> | 0.2104 <sup>*</sup>  | -0.0070 <sup>ns</sup> | 0.2983 <sup>**</sup> | 0.0769 <sup>*</sup>  | -0.0618 <sup>ns</sup> | -0.0012 <sup>ns</sup> | 0.0843 <sup>*</sup>  | -0.0008 <sup>**</sup>  | -0.0025 <sup>ns</sup> | 0.0089 <sup>ns</sup>  | -0.0005 <sup>ns</sup> | -0.0037 <sup>ns</sup> | 0.0016 <sup>ns</sup>  | -0.0119 <sup>ns</sup> | -0.0025 <sup>ns</sup> | 0                     |                      |                       |                      |                      |                      |  |
| 21 | 0.7098 <sup>**</sup> | 0.9336 <sup>**</sup> | 0.0000 <sup>ns</sup>  | 0.2899 <sup>ns</sup> | 0.2901 <sup>*</sup>  | 0.0175 <sup>ns</sup>  | 0.3276 <sup>ns</sup> | 0.1466 <sup>*</sup>  | 0.0000 <sup>ns</sup>  | 0.0000 <sup>ns</sup>  | 0.1554 <sup>*</sup>  | 0.0025 <sup>ns</sup>   | 0.0095 <sup>ns</sup>  | 0.0254 <sup>ns</sup>  | 0.0025 <sup>ns</sup>  | 0.0175 <sup>ns</sup>  | -0.0011 <sup>ns</sup> | 0.0419 <sup>ns</sup>  | 0.0056 <sup>ns</sup>  | 0.0012 <sup>ns</sup>  | 0                    |                       |                      |                      |                      |  |
| 22 | 0.5646 <sup>**</sup> | 0.8000 <sup>ns</sup> | 0.0000 <sup>ns</sup>  | 0.0400 <sup>ns</sup> | 0.1197 <sup>ns</sup> | -0.0839 <sup>ns</sup> | 0.1645 <sup>**</sup> | 0.0127 <sup>ns</sup> | 0.0000 <sup>ns</sup>  | 0.0000 <sup>ns</sup>  | 0.0299 <sup>ns</sup> | -0.0870 <sup>ns</sup>  | -0.0856 <sup>ns</sup> | -0.0705 <sup>ns</sup> | -0.0870 <sup>ns</sup> | -0.0839 <sup>ns</sup> | -0.0877 <sup>ns</sup> | -0.0787 <sup>ns</sup> | -0.0864 <sup>ns</sup> | -0.0873 <sup>ns</sup> | 0.0000 <sup>ns</sup> | 0                     |                      |                      |                      |  |
| 23 | 0.5633 <sup>**</sup> | 0.6738 <sup>**</sup> | 0.0382 <sup>ns</sup>  | 0.0627 <sup>ns</sup> | 0.1593 <sup>*</sup>  | 0.0335 <sup>ns</sup>  | 0.2881 <sup>**</sup> | 0.0889 <sup>*</sup>  | -0.0233 <sup>ns</sup> | 0.0516 <sup>ns</sup>  | 0.0990 <sup>*</sup>  | 0.0460 <sup>ns</sup>   | 0.0359 <sup>ns</sup>  | 0.0455 <sup>ns</sup>  | 0.0415 <sup>ns</sup>  | 0.0317 <sup>ns</sup>  | 0.0509 <sup>ns</sup>  | 0.0231 <sup>ns</sup>  | 0.0426 <sup>ns</sup>  | 0.0330 <sup>ns</sup>  | 0.0555 <sup>ns</sup> | -0.0492 <sup>ns</sup> | 0                    |                      |                      |  |
| 24 | 0.8462 <sup>**</sup> | 0.9607 <sup>**</sup> | 1.0000 <sup>**</sup>  | 0.8538 <sup>**</sup> | 0.7404 <sup>**</sup> | 0.9603 <sup>**</sup>  | 0.5304 <sup>**</sup> | 0.8402 <sup>**</sup> | 1.0000 <sup>**</sup>  | 1.0000 <sup>**</sup>  | 0.8575 <sup>**</sup> | 0.9649 <sup>**</sup>   | 0.9275 <sup>**</sup>  | 0.9054 <sup>**</sup>  | 0.9322 <sup>**</sup>  | 0.9236 <sup>**</sup>  | 0.9666 <sup>**</sup>  | 0.9563 <sup>**</sup>  | 0.9637 <sup>**</sup>  | 0.8483 <sup>**</sup>  | 1.0000 <sup>**</sup> | 1.0000 <sup>**</sup>  | 0.7893 <sup>**</sup> | 0                    |                      |  |
| 25 | 0.8534 <sup>**</sup> | 0.9641 <sup>**</sup> | 1.0000 <sup>**</sup>  | 0.8639 <sup>**</sup> | 0.7519 <sup>**</sup> | 0.9626 <sup>**</sup>  | 0.5449 <sup>**</sup> | 0.8478 <sup>**</sup> | 1.0000 <sup>**</sup>  | 1.0000 <sup>**</sup>  | 0.8637 <sup>**</sup> | 0.9667 <sup>**</sup>   | 0.9314 <sup>**</sup>  | 0.9100 <sup>**</sup>  | 0.9356 <sup>**</sup>  | 0.9280 <sup>**</sup>  | 0.9682 <sup>**</sup>  | 0.9592 <sup>**</sup>  | 0.9656 <sup>**</sup>  | 0.8552 <sup>**</sup>  | 1.0000 <sup>**</sup> | 1.0000 <sup>**</sup>  | 0.7983 <sup>**</sup> | 0.0000 <sup>ns</sup> | 0                    |  |
| 26 | 0.6496 <sup>**</sup> | 0.8222 <sup>**</sup> | 0.0505 <sup>ns</sup>  | 0.1825 <sup>*</sup>  | 0.2502 <sup>**</sup> | 0.0401 <sup>ns</sup>  | 0.3153 <sup>**</sup> | 0.1182 <sup>*</sup>  | -0.0127 <sup>ns</sup> | 0.0647 <sup>ns</sup>  | 0.1278 <sup>*</sup>  | 0.0491 <sup>ns</sup>   | 0.0370 <sup>ns</sup>  | 0.0461 <sup>ns</sup>  | 0.0398 <sup>ns</sup>  | 0.0356 <sup>ns</sup>  | 0.0530 <sup>ns</sup>  | 0.0349 <sup>ns</sup>  | 0.0465 <sup>ns</sup>  | 0.0258 <sup>ns</sup>  | 0.0690 <sup>ns</sup> | -0.0385 <sup>ns</sup> | 0.0586 <sup>ns</sup> | 0.8915 <sup>**</sup> | 0.8966 <sup>**</sup> |  |
