# Supplementary material for: Phylogeographic data revealed shallow genetic structure in the kelp Saccharina japonica (Laminariales, Phaeophyta)
Source: PubMed Central journal article supplement (PMC4630829; doi:10.1186/s12862-015-0517-8), 2015-11-02

Figure S2 Isolation-by distance (IBD) analyses within 22 populations (except for four populations in China and Korea). Regression of genetic differentiation (estimated by  $F_{ST}/(1 - F_{ST})$ ) against logarithm of geographical distances (km).

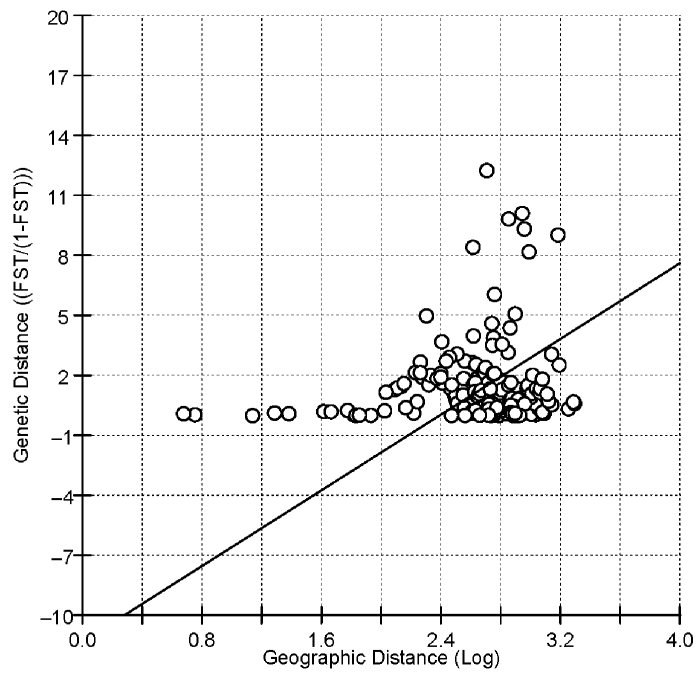

Supplement: 12862_2015_517_MOESM5_ESM.pdf [file 12862_2015_517_MOESM5_ESM.pdf]
