# Supplementary material for: Phylogeographic data revealed shallow genetic structure in the kelp Saccharina japonica (Laminariales, Phaeophyta)
Source: PubMed Central journal article supplement (PMC4630829; doi:10.1186/s12862-015-0517-8), 2015-11-02

Figure S4 Bayesian skyline plots showing effective population size as a function of time. (a) inferred from single sequence *COI*; (b) inferred from single sequence *trnW-L*; (c) inferred from combined mtDNA sequences (*COI+trnW-L*). The upper and lower limits of light blue trend represent the 95% confidence intervals of HPD analysis.

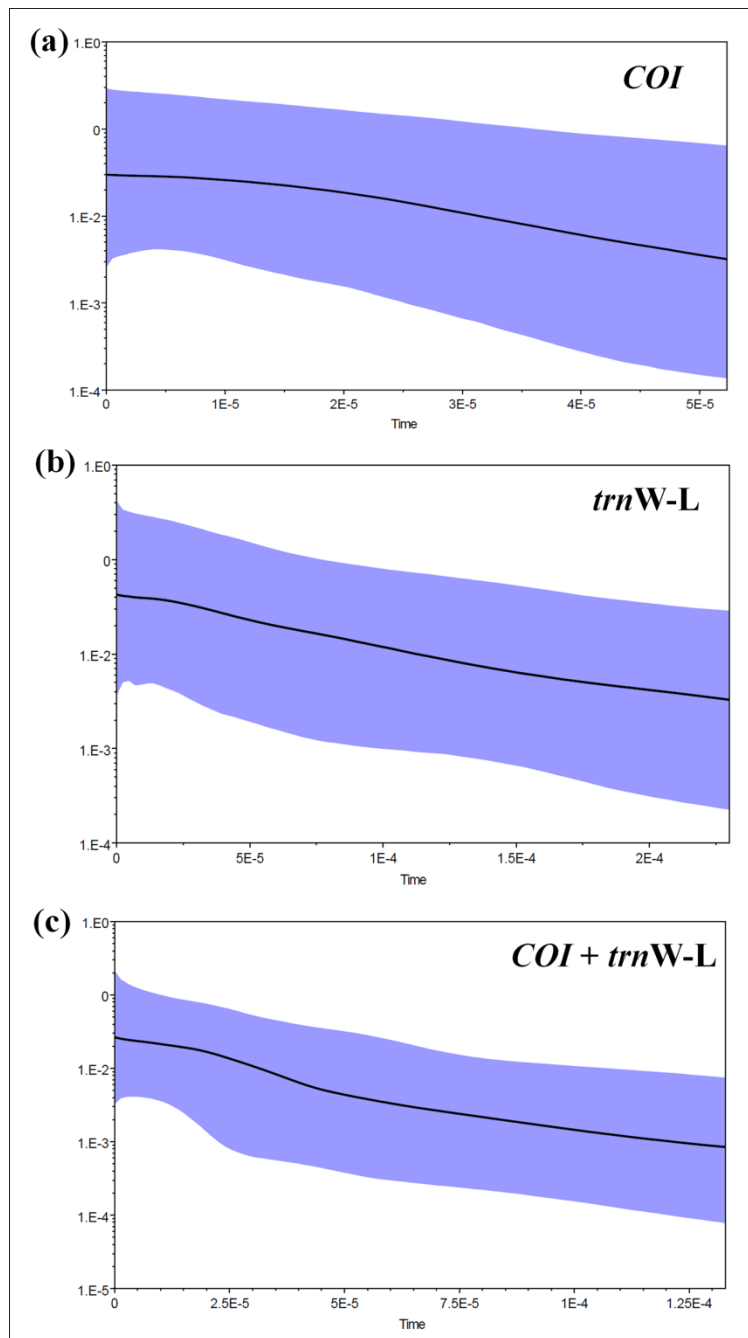

Supplement: 12862_2015_517_MOESM7_ESM.pdf [file 12862_2015_517_MOESM7_ESM.pdf]
