# Supplementary material for: Phylogeographic data revealed shallow genetic structure in the kelp Saccharina japonica (Laminariales, Phaeophyta)
Source: PubMed Central journal article supplement (PMC4630829; doi:10.1186/s12862-015-0517-8), 2015-11-02

Figure S5 Maximum clade credibility coalescent tree based on *COI*.

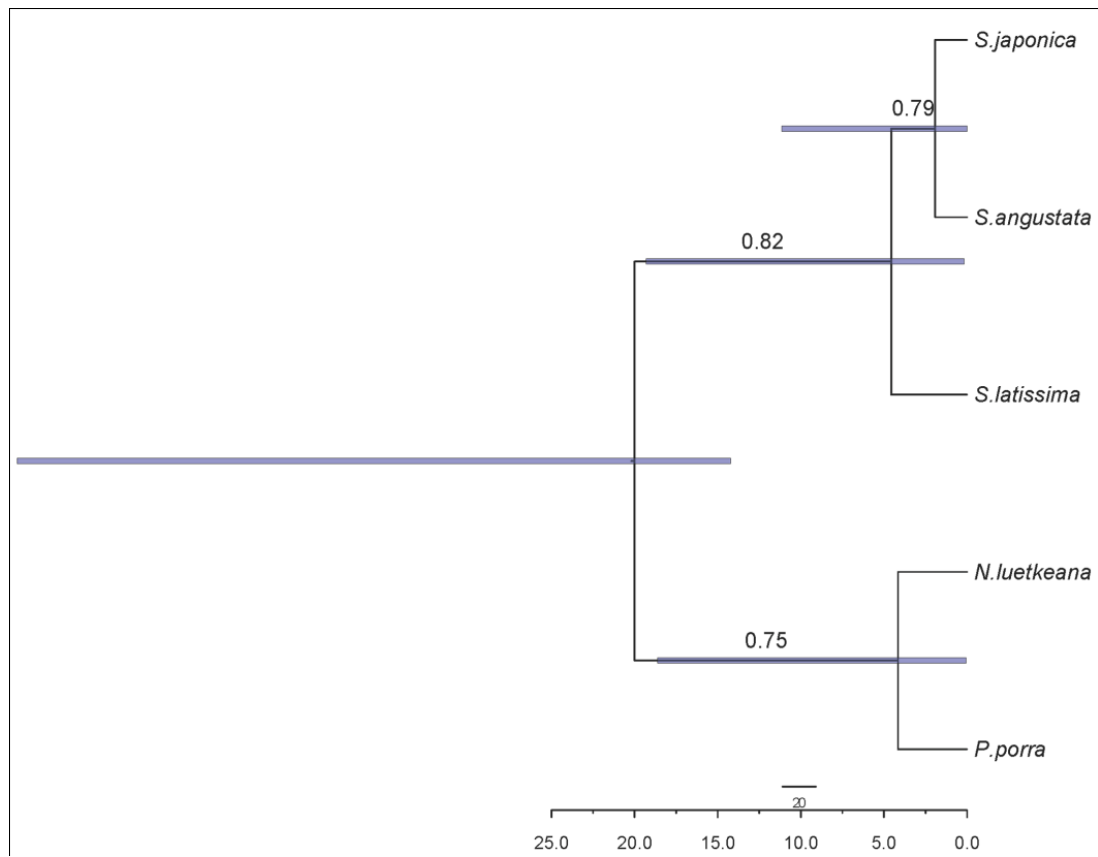

Supplement: 12862_2015_517_MOESM8_ESM.pdf [file 12862_2015_517_MOESM8_ESM.pdf]
